# Supplementary material for: Evaluation of buriti endocarp as lignocellulosic substrate for second generation ethanol production
Source: PeerJ. 2018 Aug 2;6:e5275. doi: 10.7717/peerj.5275 (PMC6076983; doi:10.7717/peerj.5275)
Supplement: Data S1 [file peerj-06-5275-s001.xlsx]

## Sheet: Glucose
Test	Abs.1	Abs.2	Abs.3	Average Glucose.	[Glucose] g/L	[Glucose] g/g	%[Glucose]
1	0.01	0.013	0.013	0.013	11.3636	0.113636	11.3636
2	0.019	0.021	0.017	0.019	16.6084	0.166084	16.6084						Abs.1	Abs.2	Abs.3	med
3	0.036	0.034	0.032	0.034	17.8322	0.178322	17.8322					P	0	0	0	0
4	0.098	0.096	0.098	0.098	51.3986	0.513986	51.3986					B	0.286	0.293	0.285	0.288
5	0.045	0.042	0.046	0.045	23.6014	0.236014	23.6014
6	0.038	0.04	0.038	0.038	33.2168	0.332168	33.2168
7	0.267	0.287	0.266	0.267	46.6783	0.466783	46.6783
8	0.391	0.387	0.389	0.389	61.2063	0.612063	61.2063
9	0.009	0.008	0.008	0.008	6.99301	0.0699301	6.99301
10	0.312	0.305	0.306	0.306	53.4965	0.534965	53.4965
11	0.043	0.04	0.038	0.04	20.979	0.20979	20.979
12	0.036	0.037	0.027	0.036	31.4685	0.314685	31.4685
13	0.033	0.027	0.03	0.03	10.4895	0.104895	10.4895
14	0.142	0.14	0.14	0.14	63.6364	0.636364	63.6364
15	0.092	0.087	0.088	0.088	76.9231	0.769231	76.9231
16	0.082	0.088	0.087	0.087	76.049	0.76049	76.049
17	0.093	0.09	0.089	0.09	78.6713	0.786713	78.6713
18	0.083	0.087	0.09	0.087	76.049	0.76049	76.049

## Sheet: RS
Test	[glicose] g/l	Abs.1	Abs.2	Abs.3	Average Abs.
0	0	0	0	0	0
1	0.2	0.498	0.5	0.499	0.499
2	0.4	0.937	0.938	0.937	0.937
3	0.6	1.345	1.35	1.353	1.35
4	0.8	1.654	1.569	1.648	1.648
5	1	1.95	1.957	1.958	1.957
Test	Abs.1	Abs.2	Abs.3	Average Abs.	[RS] g/L	[RS] g/g	%[RS]
1	0.074	0.069	0.073	0.073	10.5695	0.21139	21.139
2	0.111	0.134	0.135	0.134	8.40734	0.168147	16.8147
3	0.172	0.18	0.177	0.177	16.2307	0.162307	16.2307
4	0.528	0.53	0.528	0.528	56.0618	0.560618	56.0618
5	0.075	0.07	0.073	0.073	10.5695	0.21139	21.139
6	0.129	0.13	0.128	0.129	15.5647	0.311293	31.1293
7	0.273	0.278	0.286	0.278	46.9595	0.469595	46.9595
8	0.487	0.493	0.491	0.491	59.2423	0.592423	59.2423
9	0.045	0.047	0.048	0.047	5.67085	0.0567085	5.67085
10	0.511	0.499	0.507	0.507	58.7259	0.587259	58.7259
11	0.138	0.133	0.136	0.136	19.6911	0.196911	19.6911
12	0.312	0.309	0.31	0.31	32.9151	0.329151	32.9151
13	0.625	0.633	0.63	0.63	15.2027	0.152027	15.2027
14	0.634	0.642	0.64	0.64	61.7761	0.617761	61.7761
15	0.668	0.662	0.709	0.668	80.5985	0.805985	80.5985
16	0.657	0.663	0.765	0.663	79.9952	0.799952	79.9952
17	0.666	0.664	0.764	0.666	80.3571	0.803571	80.3571
18	0.707	0.662	0.677	0.677	81.6844	0.816844	81.6844
