# Supplementary material for: Evaluation of buriti endocarp as lignocellulosic substrate for second generation ethanol production
Source: PeerJ. 2018 Aug 2;6:e5275. doi: 10.7717/peerj.5275 (PMC6076983; doi:10.7717/peerj.5275)
Supplement: Data S3 [file peerj-06-5275-s003.xlsx]

## Sheet:  Phenolic
	Test	[gallic acid] g/l	Abs.1	Abs.2	Abs.3	Average Abs.			[gallic acid] g/l	Average Abs.
	0	0	0	0	0	0			0	0
	1	0.02	0.155	0.153	0.153	0.153			0.02	0.153
	2	0.04	0.256	0.254	0.257	0.256			0.04	0.256
	3	0.06	0.37	0.371	0.372	0.371			0.06	0.371
	4	0.08	0.51	0.509	0.51	0.51			0.08	0.51
	5	0.1	0.6	0.603	0.605	0.603			0.1	0.603
	Test	Abs.1	Abs.2	Abs.3	Average Abs.	[Phenolic] g/L	[Phenolic] g/g	%[Phenolic] 12h		Test	Abs.1	Abs.2	Abs.3	Average Abs.	[Phenolic] g/L	[Phenolic] g/g	%[Phenolic] 24h		Test	Abs.1	Abs.2	Abs.3	Average Abs.	[Phenolic] g/L	[Phenolic] g/g	%[Phenolic] 36h		Test	Abs.1	Abs.2	Abs.3	Average Abs.	[Phenolic] g/L	[Phenolic] g/g	%[Phenolic] 48h
	1.12	0.054	0.055	0.053	0.054	0.869313	0.00869313	0.869313		1.24	0.097	0.101	0.096	0.097	1.56154	0.0156154	1.56154		1.36	0.12	0.119	0.121	0.12	1.93181	0.0193181	1.93181		1.48	0.146	0.145	0.143	0.145	2.33427	0.0233427	2.33427
	2.12	0.108	0.11	0.108	0.108	1.73863	0.0173863	1.73863		2.24	0.144	0.143	0.146	0.144	2.31817	0.0231817	2.31817		2.36	0.231	0.234	0.233	0.233	3.75093	0.0375093	3.75093		2.48	0.277	0.275	0.278	0.277	4.45925	0.0445925	4.45925
	3.12	0.117	0.117	0.12	0.117	1.88351	0.0188351	1.88351		3.24	0.12	0.122	0.125	0.122	1.964	0.01964	1.964		3.36	0.144	0.147	0.145	0.145	2.33427	0.0233427	2.33427		3.48	0.204	0.209	0.203	0.204	3.28407	0.0328407	3.28407
	4.12	0.206	0.204	0.204	0.204	3.28407	0.0328407	3.28407		4.24	0.352	0.357	0.354	0.354	5.69883	0.0569883	5.69883		4.36	0.523	0.521	0.522	0.522	8.40336	0.0840336	8.40336		4.48	0.598	0.6	0.599	0.599	9.64294	0.0964294	9.64294
	5.12	0.029	0.03	0.031	0.03	0.482952	0.00482952	0.482952		5.24	0.066	0.067	0.065	0.066	1.06249	0.0106249	1.06249		5.36	0.079	0.077	0.076	0.077	1.23958	0.0123958	1.23958		5.48	0.114	0.115	0.116	0.115	1.85132	0.0185132	1.85132
	6.12	0.154	0.15	0.151	0.151	2.43086	0.0243086	2.43086		6.24	0.183	0.184	0.184	0.184	2.9621	0.029621	2.9621		6.36	0.289	0.287	0.289	0.289	4.65244	0.0465244	4.65244		6.48	0.3	0.301	0.302	0.301	4.84562	0.0484562	4.84562
	7.12	0.069	0.07	0.066	0.069	1.11079	0.0111079	1.11079		7.24	0.089	0.087	0.09	0.089	1.43276	0.0143276	1.43276		7.36	0.127	0.128	0.128	0.128	2.06059	0.0206059	2.06059		7.48	0.236	0.233	0.233	0.233	3.75093	0.0375093	3.75093
	8.12	0.193	0.192	0.19	0.192	3.09089	0.0309089	3.09089		8.24	0.243	0.245	0.244	0.244	3.92801	0.0392801	3.92801		8.36	0.351	0.354	0.354	0.354	5.69883	0.0569883	5.69883		8.48	0.405	0.407	0.41	0.407	6.55205	0.0655205	6.55205
	9.12	0.11	0.11	0.109	0.11	1.77082	0.0177082	1.77082		9.24	0.158	0.159	0.158	0.158	2.54355	0.0254355	2.54355		9.36	0.299	0.303	0.304	0.303	4.87781	0.0487781	4.87781		9.48	0.326	0.328	0.33	0.328	5.28027	0.0528027	5.28027
	10.12	0.112	0.114	0.113	0.113	1.81912	0.0181912	1.81912		10.24	0.16	0.161	0.158	0.16	2.57574	0.0257574	2.57574		10.36	0.305	0.304	0.307	0.305	4.91001	0.0491001	4.91001		10.48	0.318	0.323	0.32	0.32	5.15149	0.0515149	5.15149
	11.12	0.11	0.115	0.113	0.113	1.81912	0.0181912	1.81912		11.24	0.155	0.156	0.153	0.155	2.49525	0.0249525	2.49525		11.36	0.298	0.3	0.301	0.3	4.82952	0.0482952	4.82952		11.48	0.331	0.322	0.326	0.326	5.24808	0.0524808	5.24808
	12.12	0.108	0.109	0.109	0.109	1.75472	0.0175472	1.75472		12.24	0.149	0.151	0.151	0.151	2.43086	0.0243086	2.43086		12.36	0.305	0.304	0.304	0.304	4.89391	0.0489391	4.89391		12.48	0.326	0.325	0.32	0.325	5.23198	0.0523198	5.23198
